# Supplementary material
Source: MDPI journal article supplement (https://www.mdpi.com/2072-4292/13/18/3582)
Supplement: s1 [file s1]

# Remote Sensing-Based Quantification of the Summer Maize Yield Gap Induced by Suboptimum Sowing Dates over North China Plain

Sha Zhang <sup>1</sup>, Yun Bai <sup>1,2,\*</sup> and Jiahua Zhang <sup>1,2</sup>

<sup>1</sup> Research Center for Remote Sensing Information and Digital Earth, College of Computer Science and Technology, Qingdao University, Qingdao 266071, China; zhangsha@radi.ac.cn (S.Z.); zhangjh@radi.ac.cn (J.Z.)

<sup>2</sup> Key Laboratory of Digital Earth Science, Aerospace Information Research Institute, Chinese Academy of Sciences, Beijing 100094, China

\* Correspondence: baiyun@qdu.edu.cn

## Introduction

This supplementary contains two texts, one table, and four figures.

## Text S1. An overview of the PRYM-Maize model

### Text S1.1. Leaf-level photosynthesis model

The simple intercellular transport model [1,2] is adopted to simulate the leaf-scale photosynthesis of maize. It has been incorporated into multiple terrestrial land process models to simulate the photosynthesis of C<sub>4</sub> plants and is useful [3–5]. The basic equations are presented as

$$A_n = \min(A_v, A_e, A_s) - R_d, \quad (\text{S1})$$

$$A_v = V_m, \quad (\text{S2})$$

$$A_e = \varepsilon \cdot Q, \quad (\text{S3})$$

$$A_s = 0.7 \times 10^6 \cdot \frac{C_i}{P_{\text{atm}}}, \quad (\text{S4})$$

where  $A_n$  is the net photosynthesis rate ( $\mu\text{mol m}^{-2} \text{s}^{-1}$ );  $A_v$ ,  $A_e$ , and  $A_s$  represent Rubisco, potential electron transport, and export limited photosynthesis rates, respectively ( $\mu\text{mol m}^{-2} \text{s}^{-1}$ );  $R_d$  denotes the dark respiration ( $\mu\text{mol m}^{-2} \text{s}^{-1}$ ), and  $R_d = 0.015V_m$ ;  $V_m$  denotes the maximum carboxylation rate ( $\mu\text{mol m}^{-2} \text{s}^{-1}$ );  $Q$  denotes the incident photosynthetically active radiation on the leaf surface ( $\mu\text{mol m}^{-2} \text{s}^{-1}$ );  $\varepsilon$  denotes the intrinsic quantum efficiency;  $c_i$  denotes the intercellular partial pressure of CO<sub>2</sub> (Pa); and  $P_{\text{atm}}$  denotes the atmosphere pressure (Pa).

$V_m$  is calculated as a function of temperature ( $T$ ) and nitrogen ( $N$ ) supply [6–8], and  $\varepsilon$  is simply assumed to be limited by  $f_N(N)$  because the electron transport rate correlates well with  $V_m$  [9,10], such that

$$V_m = V_{m25} 2.4^{(T-25)/10} f_T(T) \cdot f_N(N), \quad (S5)$$

$$\frac{1}{f_T(T)} = 1 + \exp\left(\frac{-220,000 + 710(T + 273)}{R_{\text{gas}}(T + 273)}\right), \quad (S6)$$

$$\varepsilon = \varepsilon_m \cdot f_N(N), \quad (S7)$$

where  $V_{m25}$  denotes the maximum carboxylation rate at the temperature of 25 °C, and it is set to 60  $\mu\text{mol m}^{-2} \text{s}^{-1}$  for maize [9,11];  $R_{\text{gas}}$  denotes the mole constant of gas, 8.3143 J mol<sup>-1</sup> K<sup>-1</sup>;  $f_N(N)$  denotes the restrictive function of nitrogen supply, which varies between 0 and 1; and  $\varepsilon_m$  denotes the maximum value for  $\varepsilon$ , 0.067 mol mol<sup>-1</sup> [1]. Because spatial information for field nitrogen supply is unavailable, we used satellite-retrieved NDVI to calculate  $f_N(N)$ , as described by Zhang, Zhang, Bai [12]:

$$f_N(N) = \begin{cases} f_{\min} & , \text{NDVI} \leq \text{NDVI}_{\min} \\ \left( \frac{\text{NDVI} - \text{NDVI}_{\min}}{\text{NDVI}_{\max} - \text{NDVI}_{\min}} \right)^2 & , \text{NDVI}_{\min} < \text{NDVI} < \text{NDVI}_{\max} \\ 1 & , \text{NDVI} \geq \text{NDVI}_{\max} \end{cases}, \quad (S8)$$

where NDVI denotes the normalized difference vegetation index,  $\text{NDVI}_{\min}$  represents the value of NDVI in which photosynthesis is fully stressed by nitrogen (0.4);  $\text{NDVI}_{\max}$  is the peak value of NDVI time series during the growing season and is calculated as the 95th percentile of time-series NDVI values during the growing season; and  $f_{\min}$  is the value of  $f_N(N)$  under full nitrogen stress, and we set it to 0.3 in this study.

$A_s$  could not be solved by Eq.(S4) alone because the value of  $C_i$  is not easily obtained on a regional scale, and Eqs.(S1) and (S4) are combined with  $A_n$  calculation based on fluid physics [6,7,13] to avoid  $C_i$ .

$$A_n = (C_a - C_i) \cdot g, \quad (S9)$$

$$g = \frac{P_{\text{atm}} \cdot g_{\text{st}}}{R_{\text{gas}} \cdot (T + 273)}, \quad (S10)$$

where  $C_a$  denotes the partial pressure of CO<sub>2</sub> in the atmosphere, and it is set to 39 Pa;  $g$  denotes the stomatal conductance measured in  $\mu\text{mol m}^{-2} \text{s}^{-1} \text{Pa}^{-1}$ ;  $g_{\text{st}}$  denotes the stomatal conductance measured in  $\text{m s}^{-1}$ . Combining Eqs. (S1), (S4), and (S9), we obtain a form of  $A_s$  in terms of  $g$  rather than  $C_i$ :

$$A_s = \frac{g \cdot c_a + R_d}{g \cdot P_{\text{atm}} / (1.8 \times 10^4 V_m) + 1}, \quad (S11)$$

Daily canopy scale photosynthesis rate (daily gross primary productivity,  $\text{GPP}_{\text{daily}}$ ) is scaled from instantaneous leaf-level photosynthesis rate (Eq. (S1)) using a two-leaf canopy radiative transfer model [6,7,14].

$$\text{GPP}_{\text{daily}} = A_{\text{c,day}} \times (Hr_{\text{day}} \times 3600) \times M_c \times 10^{-6}, \quad (S12)$$

$$A_{c,day} = LAI_{shd} \cdot A_{n,shd} + LAI_{sun} \cdot A_{n,sun} , \quad (S13)$$

where  $GPP_{daily}$  denotes the daily gross primary productivity on a canopy scale ( $gC\ m^{-2}\ d^{-1}$ );  $A_{c,day}$  denotes the net photosynthesis rate on a canopy scale during the daytime ( $\mu mol\ m^{-2}\ s^{-1}$ );  $Hr_{day}$  denotes the length of daytime in hours (from sunrise to sunset);  $M_C$  denotes the mole mass of carbon ( $12\ g\ mol^{-1}$ ); subscripts “shd” and “sun” represent the shaded leaves and sunlight leaves, respectively; LAI denotes the total leaf area index,  $LAI_{shd}$  and  $LAI_{sun}$  denote the LAI of shaded and sunlight leaves, respectively; and  $A_{n,shd}$  and  $A_{n,sun}$  denote the  $A_n$  value of shaded leaves and sunlight leaves, respectively. To calculate maize yield, we simulate the growth of maize grain on a daily step as a function of development stage (DVS) and daily net primary productivity ( $NPP_{daily}$ ), as presented in Supplementary Text S1.3. At daily steps,  $g_{st}$  is calculated according to Bai, Zhang, Zhang [15]:

$$g_{st,i} = g_{sm,2000} \cdot f_1(VPD) \cdot f_2(Q_i) \cdot f_3(T) \cdot f_4(swc) , \quad (S14)$$

where  $f_1(VPD)$ ,  $f_2(Q_i)$ ,  $f_3(T)$ , and  $f_4(swc)$  are restrictive functions of VPD, photosynthetically active radiation (PAR:  $Q$ ),  $T$ , and soil water content ( $swc$ ), respectively;  $g_{sm,2000}$  denotes the maximum stomatal conductance at  $Q = 2000\ \mu mol\ m^{-2}\ s^{-1}$ , and it was calculated as a function of NDVI [15]. The subscript “i” indices sunlight leaves (sun) and shaded leaves (shd), respectively.

#### Text S1.2. Daily photosynthesis rate on a canopy scale

A two-leaf canopy structure model based on the radiative transfer theory [6,7,14] was used to scale leaf scale photosynthesis rate to the canopy scale, which showed good reliability in simulating canopy scale photosynthesis rate [4,6].

$$GPP_{daily} = A_{c,day} \times (Hr_{day} \times 3600) \times M_C \times 10^{-6} , \quad (S15)$$

$$A_{c,day} = LAI_{shd} \cdot A_{n,shd} + LAI_{sun} \cdot A_{n,sun} , \quad (S16)$$

$$LAI_{sun} = 2 \cos \theta (1 - \exp(-0.5 \times \Omega \times LAI / \cos \theta)) , \quad (S17)$$

$$LAI_{shd} = LAI - LAI_{sun} , \quad (S18)$$

$$\theta = \frac{\pi}{8} + \frac{3}{4} \theta_n , \quad (S19)$$

$$\begin{aligned} \cos \theta_n = & \sin \left( -23.45 \times \frac{\pi}{180} \cos \left( \frac{360(\text{DoY} + 10)}{365} \right) \right) \sin \varphi \\ & + \cos \left( -23.45 \times \frac{\pi}{180} \cos \left( \frac{360(\text{DoY} + 10)}{365} \right) \right) \cos \varphi , \end{aligned} \quad (S20)$$

where  $GPP_{daily}$  denotes the daily gross primary productivity on a canopy scale ( $gC\ m^{-2}\ d^{-1}$ ),  $A_{c,day}$  denotes the net photosynthesis rate on a canopy scale during the daytime ( $\mu mol\ m^{-2}\ s^{-1}$ );  $Hr_{day}$  denotes the length of daytime in hours (from sunrise to sunset);  $M_C$  denotes the mole mass of carbon ( $12\ g\ mol^{-1}$ ); subscript ‘shd’ and ‘sun’ represents the shaded leaves and sunlight leaves respectively; LAI denote the total leaf area index,  $LAI_{shd}$  and  $LAI_{sun}$  denotes the leaf area index of shaded and sunlight leaves respectively; and  $A_{n,shd}$  and  $A_{n,sun}$  denote the  $A_n$  value of shaded leaves and sunlight leaves respectively;  $\theta$  and  $\theta_n$  denotes the mean solar zenith angle during the daytime and solar zenith angle at noon (rad); DoY denotes the

Julian day; and  $\varphi$  denotes the local latitude (rad).  $Hr_{\text{day}}$  is calculated according to Duffie and Beckman [21]:

$$Hr_{\text{day}} = \frac{15}{2} \arccos(-\tan \varphi \cdot \tan \delta) , \quad (\text{S21})$$

$$\delta = 23.5 \sin\left(\frac{\text{DoY} + 284}{365} 2\pi\right) \times \frac{\pi}{180} , \quad (\text{S22})$$

where  $\delta$  denotes the solar declination (rad).

Photosynthetically active radiation (PAR) on sunlight leaves ( $Q_{\text{shd}}$ ) and shaded leaves ( $Q_{\text{shd}}$ ) are two critical variables in canopy photosynthesis rate simulations. The calculations of  $A_{n,\text{shd}}$  and  $A_{n,\text{shd}}$  require the values  $Q$  and stomatal conductance ( $g_{\text{st}}$ ) on shaded leaves ( $Q_{\text{shd}}$  and  $g_{\text{st,shd}}$ ) and sunlight leaves ( $Q_{\text{sun}}$  and  $g_{\text{st,sun}}$ ), and  $Q_{\text{shd}}$  and  $Q_{\text{sun}}$  are also needed for the calculations of  $g_{\text{st,shd}}$  and  $g_{\text{st,sun}}$ . We referred to Norman [14], Chen, Liu, Cihlar [6] and Liu, Chen, Cihlar [7] for obtaining  $Q_{\text{shd}}$  and  $Q_{\text{sun}}$  in the daytime:

$$C = 0.07 \times \Omega \times Q_{\text{dir}} \times (1.1 - 0.1\text{LAI}) \times \exp(-\cos \theta) , \quad (\text{S23})$$

$$Q_{\text{dif\_under}} = Q_{\text{dif}} \times \exp(-0.5 \times \Omega \times \text{LAI} / \cos \bar{\theta}) , \quad (\text{S24})$$

$$\cos \bar{\theta} = 0.537 + 0.025\text{LAI} , \quad (\text{S25})$$

$$Q_{\text{shd}} = (Q_{\text{dif}} - Q_{\text{dif\_under}}) / \text{LAI} + C , \quad (\text{S26})$$

$$Q_{\text{sun}} = Q_{\text{dir}} \frac{\cos \alpha}{\cos \theta} + Q_{\text{shd}} , \quad (\text{S27})$$

where  $C$  denotes the multiple scattered radiation ( $\mu\text{mol m}^{-2} \text{s}^{-1}$ );  $\Omega$  denotes the clumping index of vegetation, 0.9 is used for crops;  $Q_{\text{dir}}$  and  $Q_{\text{dif}}$  denote the direct and diffuse solar radiation in the daytime ( $\mu\text{mol m}^{-2} \text{s}^{-1}$ );  $\theta$  denotes the daytime mean solar zenith angle;  $Q_{\text{dif\_under}}$  denotes the daytime radiation under the canopy ( $\mu\text{mol m}^{-2} \text{s}^{-1}$ );  $\bar{\theta}$  denotes the solar zenith angle for radiation transmission;  $\alpha$  denotes the inclination angle of leaves ( $\pi/3$ ). The following method referring to Chen, Liu, Cihlar [6], Liu, Chen, Cihlar [7], Black, Chen, Lee [22] was adopted to calculate  $Q_{\text{dif}}$  and  $Q_{\text{dir}}$ :

$$R = \frac{Rg}{R_0} , \quad (\text{S28})$$

$$\frac{Rg_{\text{dif}}}{Rg} = \begin{cases} 0.13 & , R \geq 0.8 \\ 0.943 + 0.734R - 4.9R^2 + 1.796R^3 + 2.058R^4 & , R < 0.8 \end{cases} , \quad (\text{S29})$$

$$Q_{\text{dif}} = Q \cdot \frac{Rg_{\text{dif}}}{Rg} , \quad (\text{S30})$$

$$Q = k_q \cdot Rg \cdot \frac{Hr_{\text{day}}}{24} , \quad (\text{S31})$$

$$Q_{\text{dir}} = Q - Q_{\text{dif}} , \quad (\text{S32})$$

where  $R_0$  is the daily extraterrestrial solar radiation ( $\text{W m}^{-2}$ );  $R$  denotes the atmosphere

transmissivity;  $R_g$  denotes the daily global solar radiation ( $\text{W m}^{-2}$ );  $R_{g_{\text{dif}}}/R_g$  denotes the proportion of diffuse solar radiation to the global solar radiation;  $k_q$  is a factor to scale solar radiation to PPFD ( $2.0 \mu\text{mol J}^{-1}$ );  $Q_{\text{dif}}/Q$  denotes the fraction of diffusion radiation calculated according to Black, Chen, Lee [22].  $R_0$  is calculated referring to Duffie and Beckman [21]:

$$R_0 = \frac{1}{\pi} S_0 \cdot (\cos \varphi \cdot \cos \delta \cdot \sin \omega_{\text{set}} + \omega_{\text{set}} \cdot \sin \varphi \cdot \sin \delta), \quad (\text{S33})$$

$$\omega_{\text{set}} = \arccos(-\tan \varphi \tan \delta), \quad (\text{S34})$$

where  $S_0$  denotes the solar constant ( $1367 \text{ W m}^{-2}$ );  $\omega_{\text{set}}$  denotes the hour angle of sunset (rad).

### Text S1.3 Respiration and dry matter partitioning on a daily step

Dry matter partitioning in each day is based on the acquisition of net primary productivity (NPP), satellite-retrieved leave area index (LAI), and accumulated biomass.

$$M_{\text{leaf}}^{(t_0)} = \text{LAI}^{(t_0)} / \text{SLA}, \quad (\text{S35})$$

$$M_x^{(t_0)} = \sum_{t=\text{EM}}^{t_0} \left( \text{NPP}_{\text{daily}}^{(t)} \times F_x^{(t)} \right), \quad x \in \{\text{root, stem, grain}\}, \quad (\text{S36})$$

where superscript  $(t_0)$  denotes current date and  $(t)$  indices a specific date;  $M_x^{(t_0)}$  is the accumulated dry matter of organ ' $x$ ' in the current day ( $\text{gC m}^{-2} \text{ d}^{-1}$ ); SLA denotes the leaf specific area ( $\text{m}^2 \text{ gC}^{-1}$ ), refer to Osborne, Gornall, Hooker [17] for its calculation;  $\text{NPP}_{\text{daily}}$  denote the daily total NPP ( $\text{gC m}^{-2} \text{ d}^{-1}$ ).

The net dry matter produced by photosynthesis,  $\text{NPP}_{\text{daily}}$ , is calculated as a difference between  $\text{GPP}_{\text{daily}}$  and daily total respiration rate:

$$\text{NPP}_{\text{daily}}^{(d)} = \text{GPP}_{\text{daily}}^{(d)} - R_a^{(d)}, \quad (\text{S37})$$

$$R_a^{(d)} = R_g^{(d)} + R_{m, \text{stem}}^{(d)} + R_{m, \text{root}}^{(d)} + R_{m, \text{leaf}}^{(d)} + R_{m, \text{grain}}^{(d)}, \quad (\text{S38})$$

$$R_g^{(d)} = r_g \cdot \text{GPP}_{\text{daily}}^{(d)}, \quad (\text{S39})$$

$$R_{m, x}^{(d)} = r_{m, x} \cdot M_x^{(d)} \cdot Q_{10, x}^{(T-25)/10}, \quad (\text{S40})$$

where  $R_a$ ,  $R_g$ , and  $R_m$  denote the daily total, growth, and maintenance respiration rates ( $\text{gC m}^{-2} \text{ d}^{-1}$ );  $r_g$  and  $r_m$  denote the growth respiration (0.25) and maintenance coefficients (Table S1);  $x \in \{\text{stem, root, leaf, grain}\}$ ;  $Q_{10}$  denotes the temperature sensitivity parameter of respiration reflecting the increments of respiration rate with an increase of temperature by  $10^\circ \text{C}$ .

We used the dry matter allocation method adopted by Osborne, Gornall, Hooker [17] to calculate the fraction of daily dry matter partitioned to organ ' $x$ ' ( $Fr_x$ ). This method calculates  $Fr_x$  as a function of the development stage (DVS). The method to calculate the  $Fr_x$  of leaf, stem, and root is presented as follows,

$$Fr_x^{(t_0)} = \frac{\exp(a_x + b_x \cdot \text{DVS}^{(t_0)})}{\left( \sum_{x \in \{\text{leaf, stem, root}\}} \exp(a_x + b_x \cdot \text{DVS}^{(t_0)}) \right) + 1}, \quad (\text{S41})$$

and  $Fr_x$  is the residual of the  $Fr_x$  value of the three organs above:

$$Fr_{\text{gain}}^{(t_0)} = 1 - \left( Fr_{\text{leaf}}^{(t_0)} + Fr_{\text{stem}}^{(t_0)} + Fr_{\text{root}}^{(t_0)} \right), \quad (\text{S42})$$

where  $a_x$  and  $b_x$  were empirical coefficients (Table S1), which controls the shape of the curve of  $Fr_x$ ; DVS denotes the development stage of the crop (0 – 2), and DVS = 1 indicates the flowering when the accumulation of grains starts. DVS = 2 indicates the maturity stage.

### Text S2. Persistent factors assessment

Factors affecting Yg could be categorized into the persistent and non-persistent factors. Persistent factors include field managements, soil properties, and terrains. In this study, Yg<sub>0</sub> was induced by suboptimum SDT. However, SDT is also affected by persistent and non-persistent factors. A satellite-based method proposed by Farmaha, Lobell, Boone [25] is useful for disaggregating the two components. This method uses time-series Yg rasters to calculate the persistent factors percentage (PFP) in Yg within a small region and could be summarized as the following four steps.

- Use one of the time-series Yg rasters as a 'Ranking raster', and group pixel-level Yg in ranking raster in small Yg (SYg) or large Yg (LYg) (orange regions in Figure S2), which respectively correspond to bottom or top decile of Yg distribution; mean values of SYg or LYg in ranking raster are denoted as SYg<sub>R</sub> or LYg<sub>R</sub>.
- Track the values of pixels, grouped into SYg or LYg in step (a), across other years' rasters (called 'Non-raking raster'); mean values of SYg or LYg pixels (yellow regions in Figure S2) in non-ranking rasters are denoted as SYg<sub>NR</sub> or LYg<sub>NR</sub>.
- Calculate PFP based on the selected ranking year as follows:

$$\text{PFP}_{\text{SYg}} = \frac{\sum (\text{SYg}_{\text{NR}} - \overline{\text{Yg}}_{\text{ann}}) / (\text{NY} - 1)}{\text{SYg}_{\text{R}} - \overline{\text{Yg}}_{\text{ann}}}, \quad (\text{S43})$$

$$\text{PFP}_{\text{LYg}} = \frac{\sum (\text{LYg}_{\text{NR}} - \overline{\text{Yg}}_{\text{ann}}) / (\text{NY} - 1)}{\text{LYg}_{\text{R}} - \overline{\text{Yg}}_{\text{ann}}}, \quad (\text{S44})$$

where PFP<sub>SYg</sub> and PFP<sub>LYg</sub> denote the PFP values computed based on SYg and LYg groups, respectively; NY denotes the number of years under investigation; Yg<sub>ann</sub> denotes mean annual regional Yg for all years.

- Repeat step (a) for each year, and use the steps followed to calculate PFP<sub>SYg</sub> and PFP<sub>LYg</sub> based on each selected ranking raster; then PFP<sub>SYg</sub> and PFP<sub>LYg</sub> based on each raking raster are averaged to obtain the final values.

**Table S1. Values of coefficients for calculating maize respiration and dry matter allocation.**

| Coefficients      | Values<br>(Dimensional ) | Coefficients         | Values<br>(Unit: g CH <sub>2</sub> O per gram dry matter) |
|-------------------|--------------------------|----------------------|-----------------------------------------------------------|
| $a_{\text{leaf}}$ | 13.0                     | $r_{\text{m,grain}}$ | 0.005                                                     |
| $a_{\text{stem}}$ | 12.5                     | $r_{\text{m,leaf}}$  | 0.011                                                     |
| $a_{\text{root}}$ | 12.5                     | $r_{\text{m,stem}}$  | 0.006                                                     |
| $b_{\text{leaf}}$ | -11.2                    | $r_{\text{m,root}}$  | 0.006                                                     |
| $b_{\text{stem}}$ | -10.0                    |                      |                                                           |
| $b_{\text{root}}$ | -12.4                    |                      |                                                           |

**Figure S1: The diagram for calculating small yield gap (SYg) and large yield gap (LYg) in ranking and non-ranking rasters.**

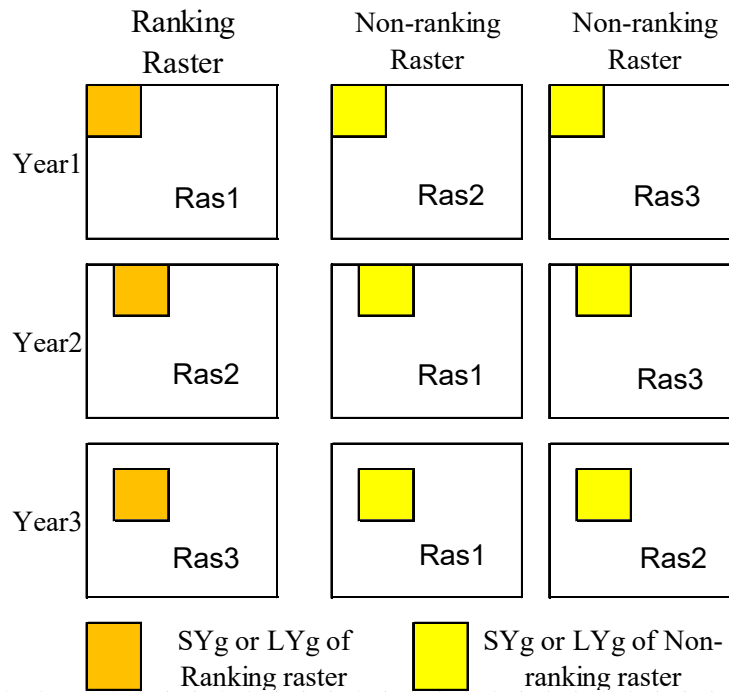

**Figure S2. One km pixels that were continuously cropped with summer maize in the period 2010 to 2015 over the NCP.**

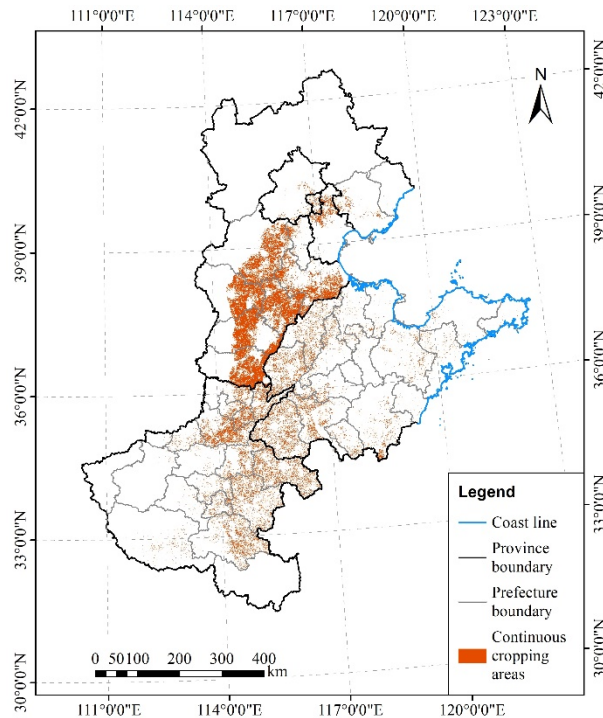

**Figure S3. Persistent factor percentage (PFP) based on 1 km  $Y_{g0}$  (a) and 5 km  $Y_{g0}$  (b), and a comparison between 1 km PFP and 5 km PFP over space (c). The value intervals in the legends of panel (a) and (b) are right-closed and left-open.  $PFP_{SYg}$  denotes the PFP value**

calculated in terms of  $Y_g$  of croplands grouped in small  $Y_g$ , as defined in Farmaha, Lobell, Boone [25] or illustrated in Supplementary Text S2. In this study, PFP was calculated for each pixel using surrounding pixels within a buffer of 50 km. However, not all pixels within the buffer were used, only pixels that met the criteria (see Section 2.3.4—Step 4) for computing  $Y_p$  from  $Y_{p0}$  were kept.

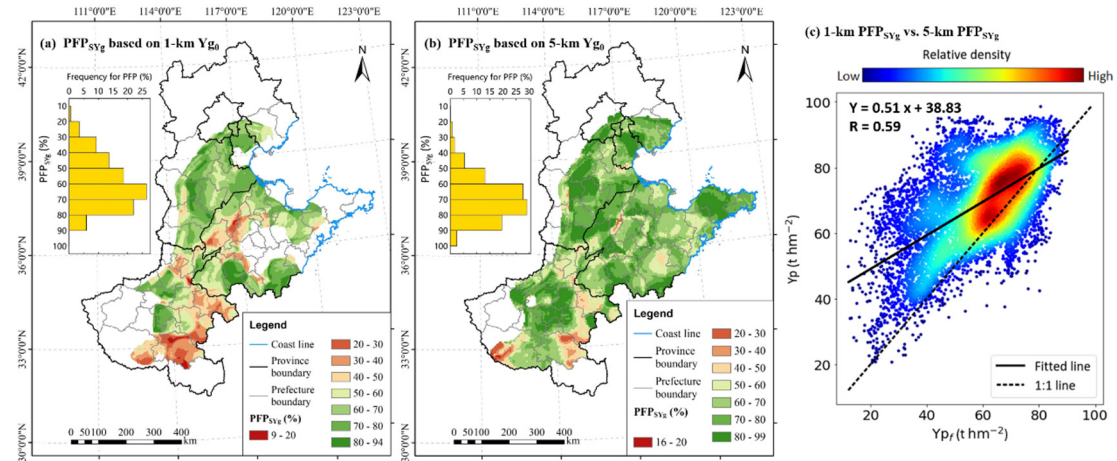

Figure S4. Modeled yield potential ( $Y_p$ ) vs. modeled farmers' yield potential ( $Y_{pf}$ ).

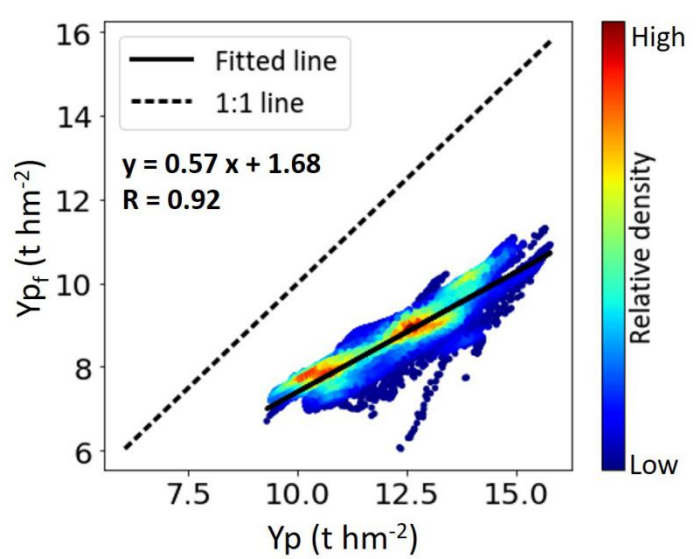

## References

1. Collatz GJ, Ribascarbo M, Berry JA. Coupled Photosynthesis-Stomatal Conductance Model for Leaves of C4 Plants. *Functional Plant Biology* 1992; **19**(5): 519-38.
2. Berry JA, Farquhar GD. The CO<sub>2</sub> concentrating function of C4 photosynthesis a biochemical model. 1978.
3. Jiang C, Ryu Y. Multi-scale evaluation of global gross primary productivity and evapotranspiration products derived from Breathing Earth System Simulator (BESS). *Remote Sens Environ* 2016; **186**: 528-47.



- 
4. Ryu Y, Baldocchi DD, Kobayashi H, et al. Integration of MODIS land and atmosphere products with a coupled-process model to estimate gross primary productivity and evapotranspiration from 1 km to global scales. *Global Biogeochem Cycles* 2011; **25**(4).
  5. Mo X, Liu S, Lin Z. Evaluation of an ecosystem model for a wheat–maize double cropping system over the North China Plain. *Environ Model Software* 2012; **32**: 61-73.
  6. Chen JM, Liu J, Cihlar J, Goulden ML. Daily canopy photosynthesis model through temporal and spatial scaling for remote sensing applications. *Ecol Model* 1999; **124**(2–3): 99-119.
  7. Liu J, Chen JM, Cihlar J, Chen W. Net primary productivity distribution in the BOREAS region from a process model using satellite and surface data. *J Geophys Res: Atmos* 1999; **104**(D22): 27735-54.
  8. Bonan GB. Land-atmosphere CO<sub>2</sub> exchange simulated by a land surface process model coupled to an atmospheric general circulation model. *J Geophys Res* 1995: Medium: X; Size: pp. 2817-31.
  9. Caemmerer SV. Biochemical models of leaf photosynthesis. *Quarterly Review of Biology* 2000: 165.
  10. Medlyn BE, Dreyer E, Ellsworth D, et al. Temperature response of parameters of a biochemically based model of photosynthesis. II. A review of experimental data. *Plant Cell Environ* 2002; **25**(9): 1167-79.
  11. Kim S, Gitz D, Sicher R, Baker J, Timlin D, Reddy V. Temperature dependence of growth, development, and photosynthesis in maize under elevated CO<sub>2</sub>. *Environmental and Experimental Botany* 2007; **61**(3): 224-36.
  12. Zhang S, Zhang J, Bai Y, et al. Evaluation and improvement of the daily boreal ecosystem productivity simulator in simulating gross primary productivity at 41 flux sites across Europe. *Ecol Model* 2018; **368**: 205-32.
  13. Leuning R. Modelling Stomatal Behaviour and and Photosynthesis of *Eucalyptus grandis*. *Functional Plant Biology* 1990; **17**(2): 159-75.
  14. Norman JM. Simulation of Microclimates A2. In: Hatfield JL, Thomason IJ, eds. *Biometeorology in Integrated Pest Management*: Academic Press; 1982: 65-99.
  15. Bai Y, Zhang J, Zhang S, Yao F, Magliulo V. A remote sensing-based two-leaf canopy conductance model: Global optimization and applications in modeling gross primary productivity and evapotranspiration of crops. *Remote Sens Environ* 2018; **215**: 411-37.
  16. Supit I, Hooijer AA, Van Diepen CA. System description of the WOFOST 6.0 crop simulation model implemente in CGMS. Volume 1: Theory and Algorithms. Brussels, Luxembourg: Joint research centre, European commission; 1994.
  17. Osborne T, Gornall J, Hooker J, et al. JULES-crop: a parametrisation of crops in the Joint UK Land Environment Simulator. *Geosci Model Dev* 2015; **8**(4): 1139-55.
  18. Peng B, Guan K, Chen M, et al. Improving maize growth processes in the community land model: Implementation and evaluation. *Agr Forest Meteorol* 2018; **250-251**: 64-89.
  19. Shawon AR, Ko J, Ha B, Jeong S, Kim DK, Kim H-Y. Assessment of a Proximal Sensing-integrated Crop Model for Simulation of Soybean Growth and Yield. *Remote Sensing* 2020; **12**(3).
  20. Huang Y, Ryu Y, Jiang C, et al. BESS-Rice: A remote sensing derived and biophysical process-based rice productivity simulation model. *Agr Forest Meteorol* 2018; **256-257**: 253-69.
  21. Duffie JA, Beckman WA. Solar Radiation. *Solar Engineering of Thermal Processes*: John Wiley & Sons, Inc.; 2013: 3-42.
  22. Black TA, Chen JM, Lee X, Sagar RM. Characteristics of shortwave and longwave irradiances under

---

a Douglas-fir forest stand. *Canadian Journal of Forest Research* 1991; **21**(7): 1020-8.

23. Levis S, Bonan GB, Kluzek E, et al. Interactive Crop Management in the Community Earth System Model (CESM1): Seasonal Influences on Land–Atmosphere Fluxes. *J Clim* 2012; **25**(14): 4839-59.
24. He L, Chen JM, Liu J, et al. Optimization of water uptake and photosynthetic parameters in an ecosystem model using tower flux data. *Ecol Model* 2014; **294**: 94-104.
25. Farmaha BS, Lobell DB, Boone KE, Cassman KG, Yang HS, Grassini P. Contribution of persistent factors to yield gaps in high-yield irrigated maize. *Field Crops Research* 2016; **186**: 124-32.
